# Supplementary material for: Geissospermiculatine, a New Alkaloid from Geissospermum reticulatum Bark
Source: PubMed Central journal article supplement (PMC7795935; doi:10.3390/molecules26010143), 2020-12-31
Supplement: molecules-26-00143-s001.pdf [file molecules-26-00143-s001.pdf]

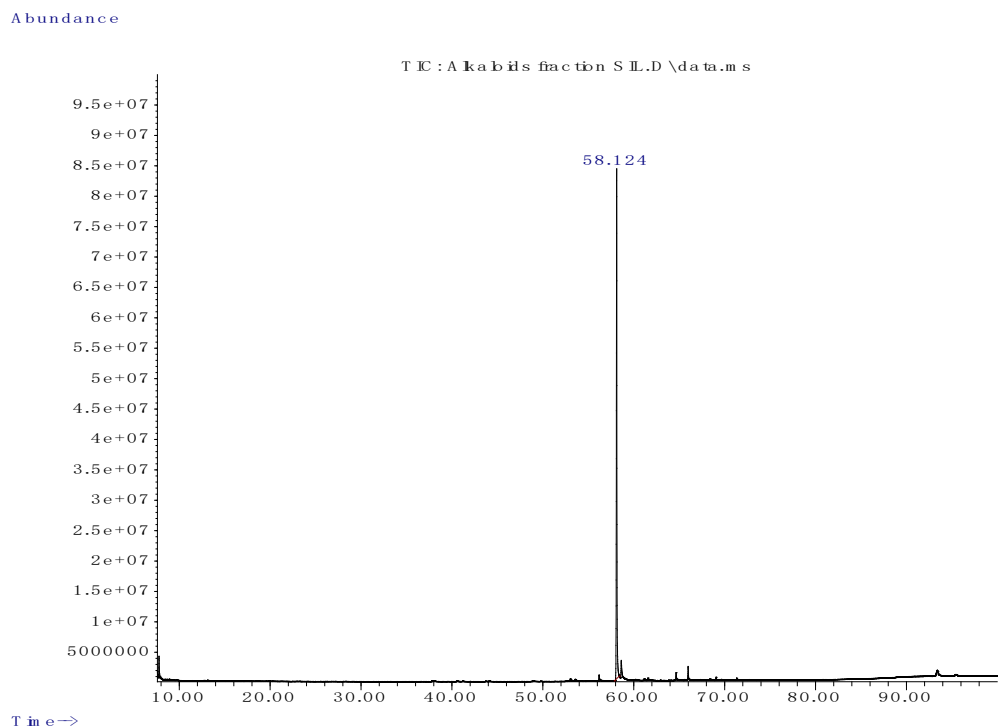

**Figure S1.** GC-MS chromatogram of studied fraction after the silylation process.

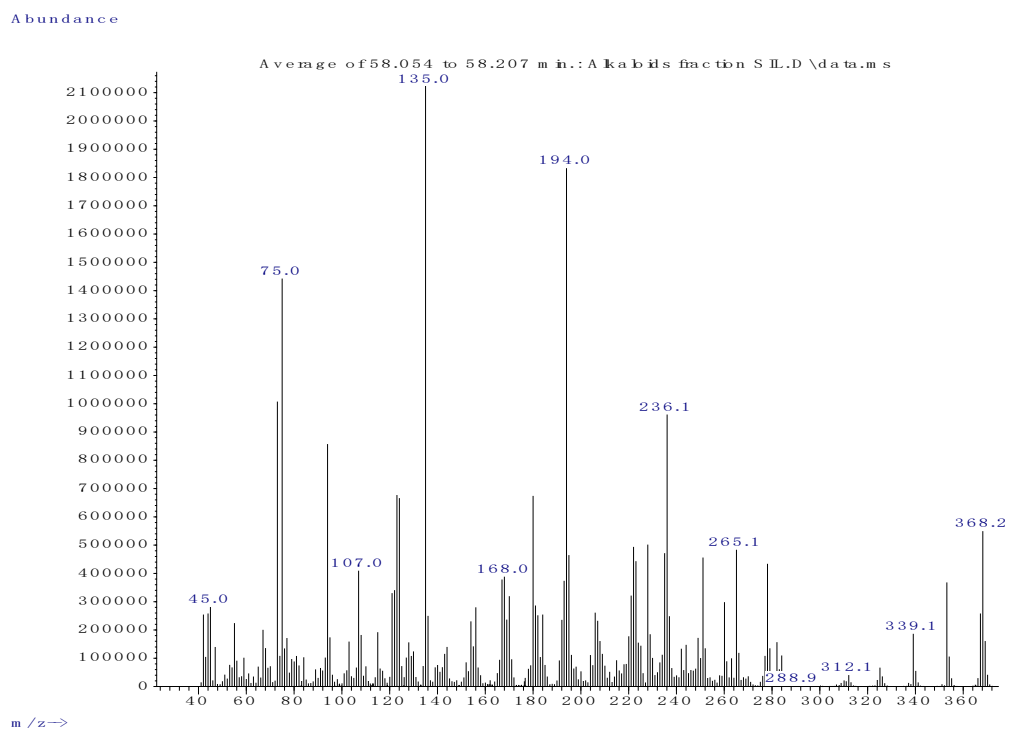

**Figure S2.** Mass spectrum of silylated geissospermiclatine (Rt = 58.124 min.) from GC-MS analysis.

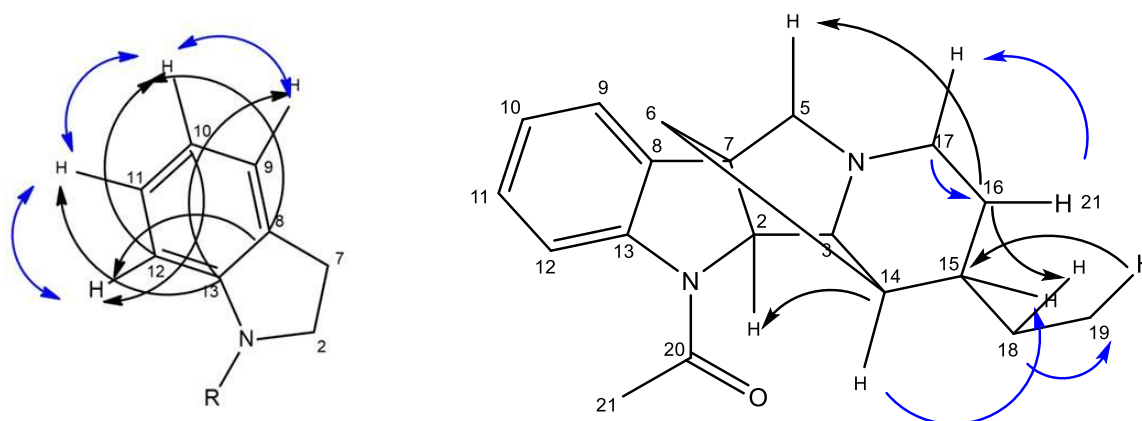

Figure S3. Important HMBC (in black) and COSY (in blue) correlations of 4.

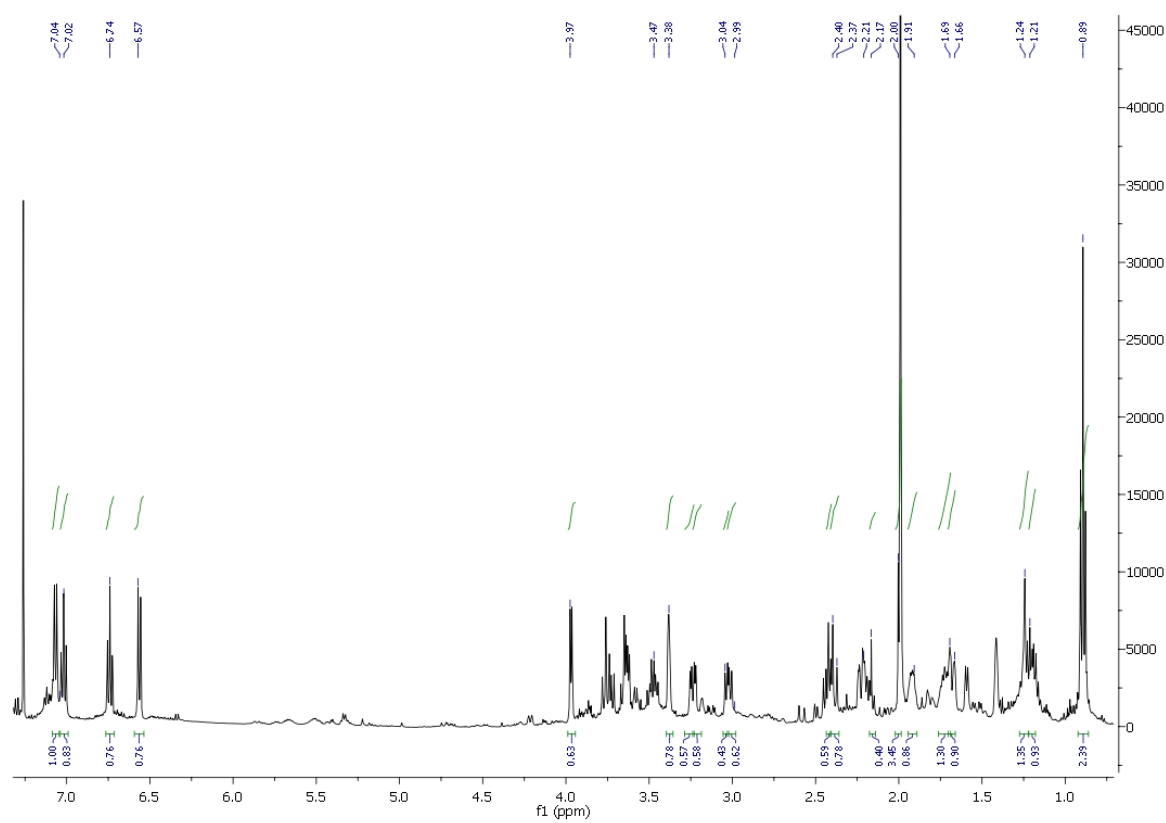

Figure S4.  $^1\text{H}$  NMR spectrum of geissospermiclatine.

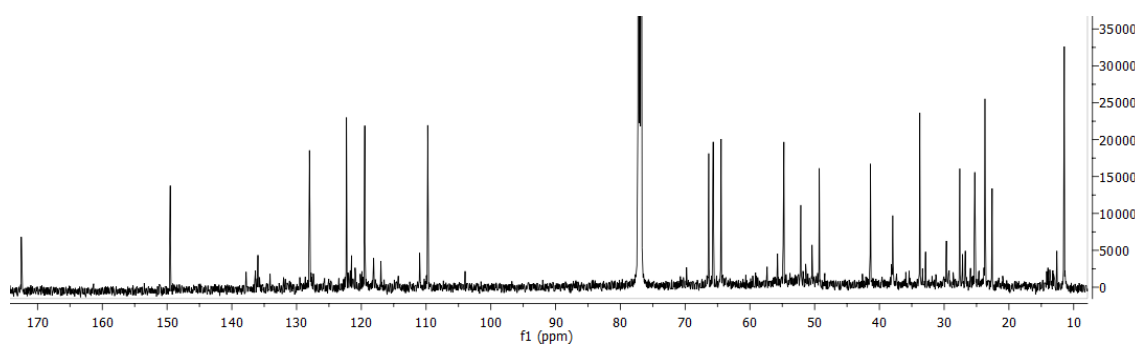

Figure S5.  $^{13}\text{C}$  NMR spectrum of geissospermiclatine.

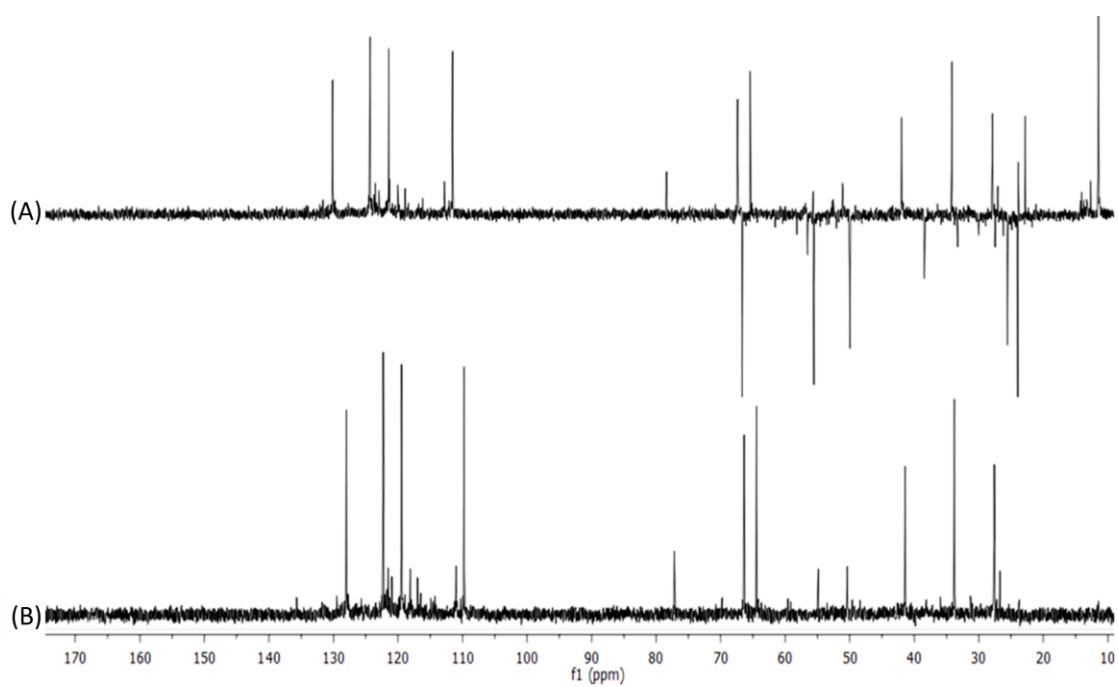

Figure S6. DEPT-135 (A) and DEPT-90 (B) NMR spectra of geissospermiculate.

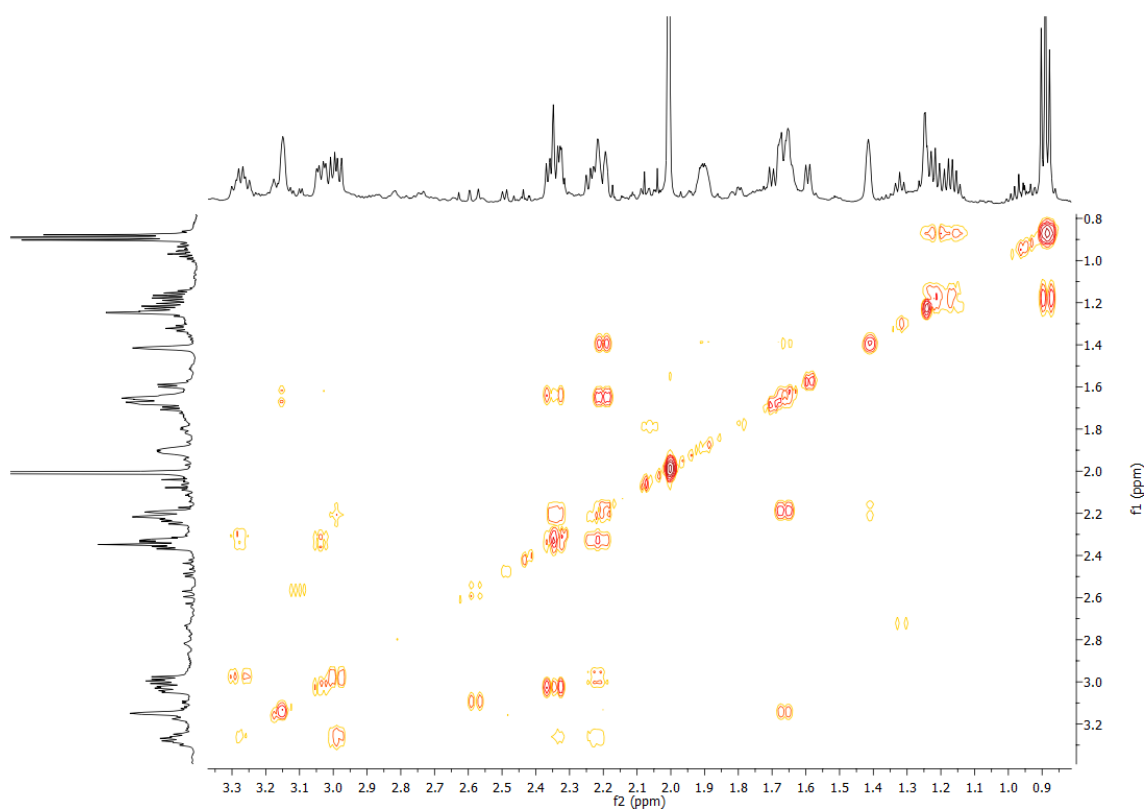

Figure S7. COSY spectrum of geissospermiculate.

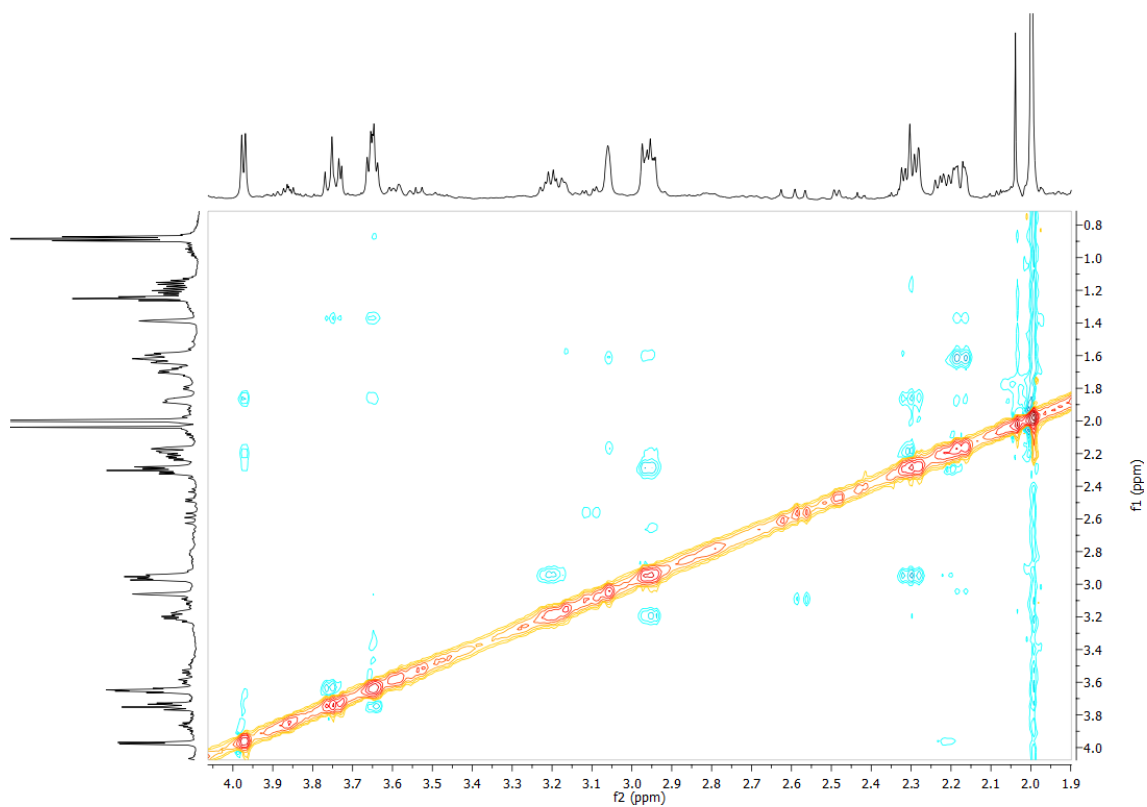

Figure S8. ROESY spectrum of geissospermiclatine.

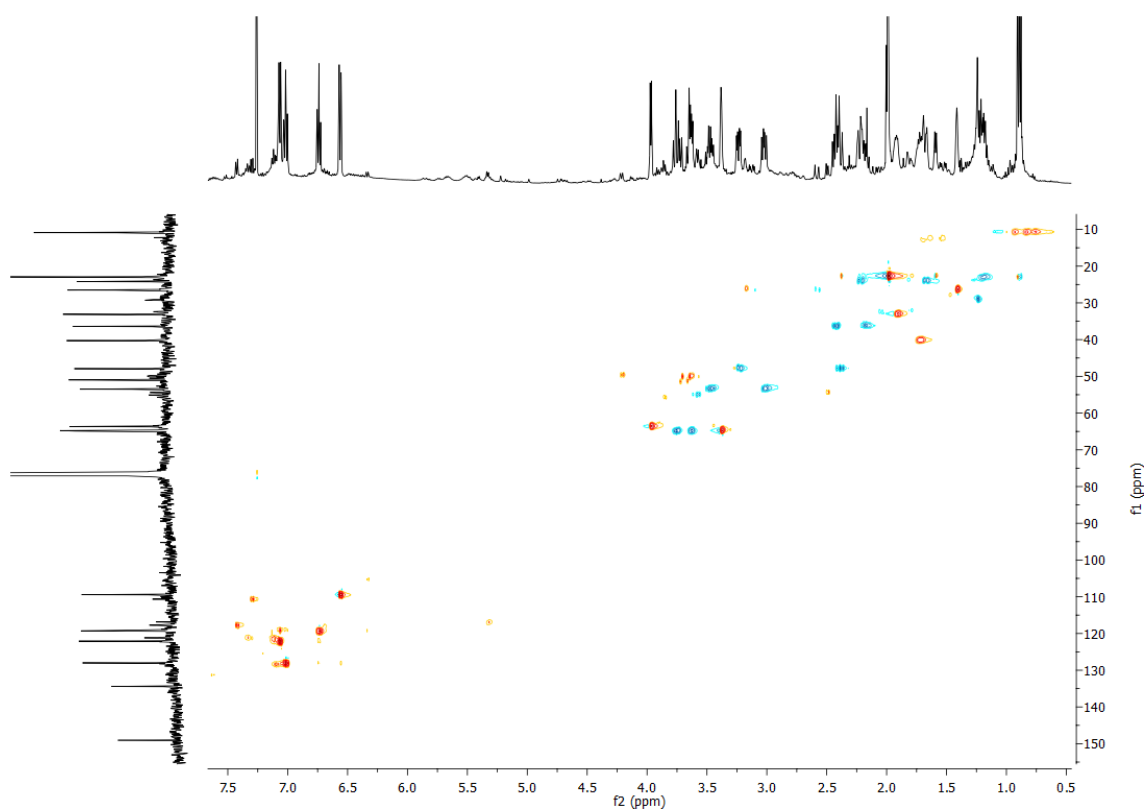

Figure S9. HSQC spectrum of geissospermiclatine.

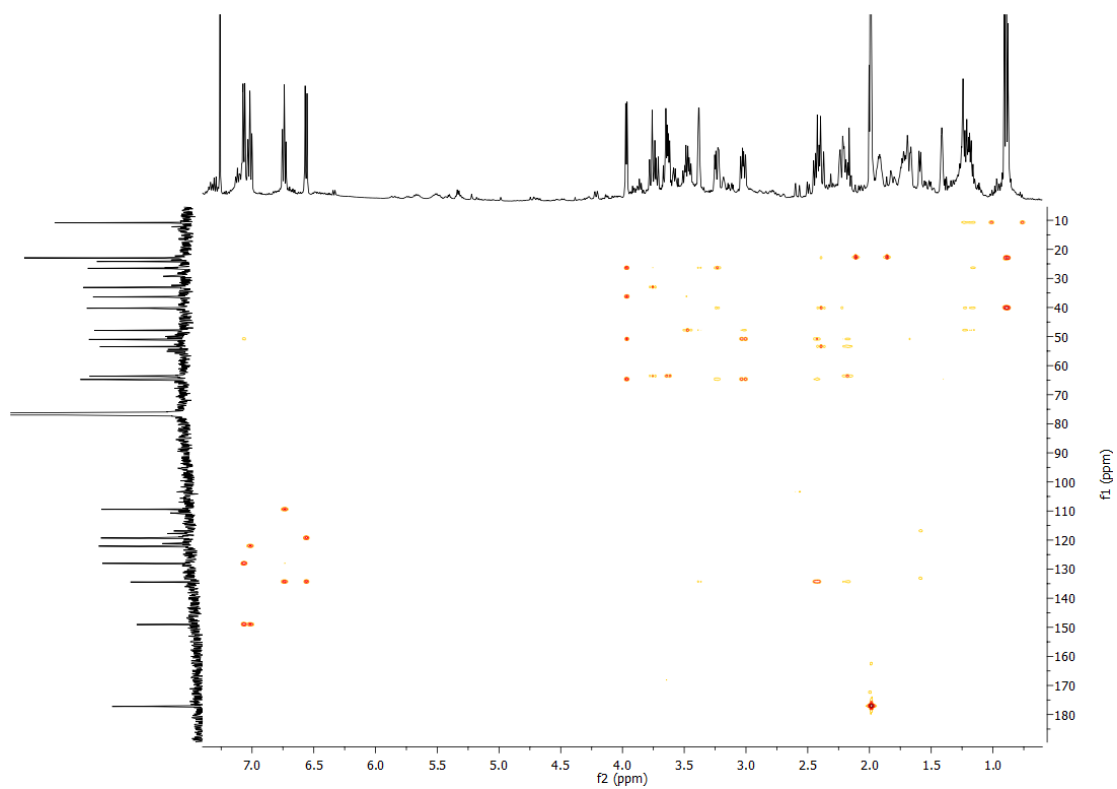

Figure S10. HMBC spectrum of geissospermiculate.

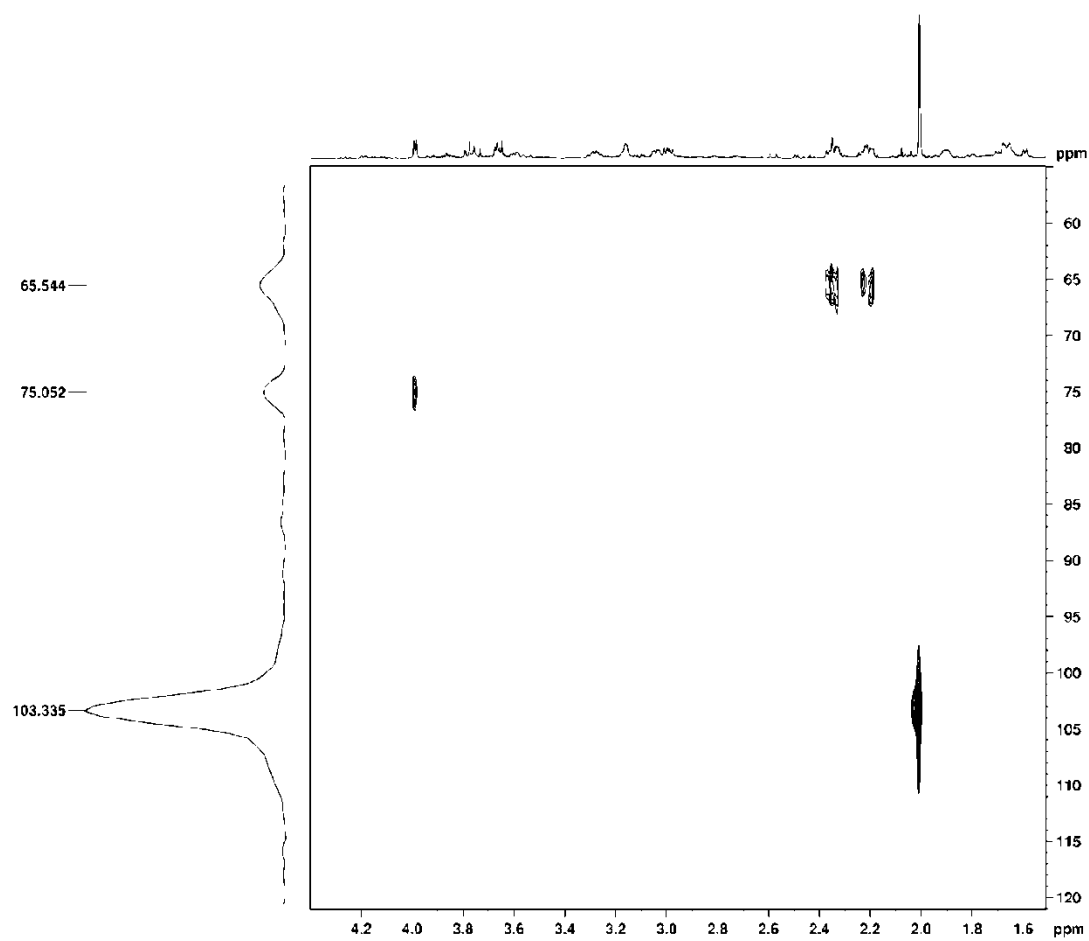Figure S11.  $^1\text{H}$ - $^{15}\text{N}$  HMBC spectrum of geissospermiculate.
